# Supplementary material for: Distinct Mechanisms Underlying Resveratrol-Mediated Protection from Types of Cellular Stress in C6 Glioma Cells
Source: MDPI journal article supplement (doi:10.3390/ijms18071521), 2017-07-14
Supplement: s1 [file s1]

**Table S1. One way ANOVA comparison of the viability of UV irradiated C6 cells in the presence or absence of resveratrol**

| Comparison                      | Significant? P < 0.05? |
|---------------------------------|------------------------|
| Untreated vs Mock               | No                     |
| Untreated vs UV                 | Yes                    |
| Untreated vs UV + Resveratrol   | No                     |
| Untreated vs Resveratrol        | No                     |
| Mock vs UV                      | Yes                    |
| Mock vs UV + Resveratrol        | No                     |
| Mock vs Resveratrol             | No                     |
| UV vs UV + Resveratrol          | Yes                    |
| UV vs Resveratrol               | Yes                    |
| UV + Resveratrol vs Resveratrol | No                     |

  

|                                |                  |
|--------------------------------|------------------|
| R <sup>2</sup> 0.9335, F 28.06 |                  |
|                                | <b><u>df</u></b> |
| Treatment                      | 4                |
| Individual                     | 2                |
| Residual                       | 8                |
| Total                          | 14               |

**Table S2. One way ANOVA comparison of the viability of tBHP treated C6 cells in the presence or absence of resveratrol**

| Comparison                        | Significant? P < 0.05? |
|-----------------------------------|------------------------|
| Untreated vs Mock                 | No                     |
| Untreated vs tBHP                 | Yes                    |
| Untreated vs tBHP + Resveratrol   | No                     |
| Untreated vs Resveratrol          | No                     |
| Mock vs tBHP                      | Yes                    |
| Mock vs tBHP + Resveratrol        | No                     |
| Mock vs Resveratrol               | No                     |
| tBHP vs tBHP + Resveratrol        | Yes                    |
| tBHP vs Resveratrol               | Yes                    |
| tBHP + Resveratrol vs Resveratrol | No                     |

  

|                                |                  |
|--------------------------------|------------------|
| R <sup>2</sup> 0.9810, F 103.4 |                  |
|                                | <b><u>df</u></b> |
| Treatment                      | 4                |
| Individual                     | 2                |
| Residual                       | 8                |
| Total                          | 14               |

**Table S3. One way ANOVA comparison of caspase activation induced by UV irradiation in the presence or absence of resveratrol**

| Comparison                        | Significant? P < 0.05? |
|-----------------------------------|------------------------|
| Mock vs UV                        | Yes                    |
| Mock vs UV + zVAD-fmk             | No                     |
| Mock vs zVAD-fmk                  | No                     |
| Mock vs UV + Resveratrol          | Yes                    |
| Mock vs Resveratrol               | No                     |
| Mock vs Untreated                 | No                     |
| UV vs UV + zVAD-fmk               | Yes                    |
| UV vs zVAD-fmk                    | Yes                    |
| UV vs UV + Resveratrol            | Yes                    |
| UV vs Resveratrol                 | Yes                    |
| UV vs Untreated                   | Yes                    |
| UV + zVAD-fmk vs zVAD-fmk         | No                     |
| UV + zVAD-fmk vs UV + Resveratrol | Yes                    |
| UV + zVAD-fmk vs Resveratrol      | No                     |
| UV + zVAD-fmk vs Untreated        | No                     |
| zVAD-fmk vs UV + Resveratrol      | Yes                    |
| zVAD-fmk vs Resveratrol           | No                     |
| zVAD-fmk vs Untreated             | No                     |
| UV + Resveratrol vs Resveratrol   | Yes                    |
| UV + Resveratrol vs Untreated     | Yes                    |
| Resveratrol vs Untreated          | No                     |

R<sup>2</sup> 0.9935, F 303.9

|            | <u>df</u> |
|------------|-----------|
| Treatment  | 6         |
| Individual | 2         |
| Residual   | 12        |
| Total      | 20        |

**Table S4. One way ANOVA comparison of caspase activation induced by tBHP in the presence or absence of resveratrol**

| <b>Comparison</b>                    | <b>Significant? P &lt; 0.05?</b> |
|--------------------------------------|----------------------------------|
| Untreated vs tBHP                    | Yes                              |
| Untreated vs Mock                    | No                               |
| Untreated vs Vehicle + tBHP          | Yes                              |
| Untreated vs Resveratrol             | No                               |
| Untreated vs tBHP + Resveratrol      | No                               |
| tBHP vs Mock                         | Yes                              |
| tBHP vs Vehicle + tBHP               | No                               |
| tBHP vs Resveratrol                  | Yes                              |
| tBHP vs tBHP + Resveratrol           | Yes                              |
| Mock vs Vehicle + tBHP               | Yes                              |
| Mock vs Resveratrol                  | No                               |
| Mock vs tBHP + Resveratrol           | No                               |
| Vehicle + tBHP vs Resveratrol        | Yes                              |
| Vehicle + tBHP vs tBHP + Resveratrol | Yes                              |
| Resveratrol vs tBHP + Resveratrol    | No                               |

R<sup>2</sup> 0.9992, F 2432

|            | <b>df</b> |
|------------|-----------|
| Treatment  | 5         |
| Individual | 2         |
| Residual   | 10        |
| Total      | 17        |

**Table S5. One way ANOVA comparison of phosphorylated Tau in C6 cells UV irradiated or treated with tBHP in the presence or absence of resveratrol**

| Comparison                             | Significant? P < 0.05? |
|----------------------------------------|------------------------|
| Mock vs UV                             | Yes                    |
| Mock vs Resveratrol                    | Yes                    |
| Mock vs Resveratrol + UV               | Yes                    |
| Mock vs tBHP                           | Yes                    |
| Mock vs Resveratrol + tBHP             | Yes                    |
| UV vs Resveratrol                      | Yes                    |
| UV vs Resveratrol + UV                 | Yes                    |
| UV vs tBHP                             | No                     |
| UV vs Resveratrol + tBHP               | Yes                    |
| Resveratrol vs Resveratrol + UV        | Yes                    |
| Resveratrol vs tBHP                    | Yes                    |
| Resveratrol vs Resveratrol + tBHP      | Yes                    |
| Resveratrol + UV vs tBHP               | Yes                    |
| Resveratrol + UV vs Resveratrol + tBHP | Yes                    |
| tBHP vs Resveratrol + tBHP             | Yes                    |

R<sup>2</sup> 0.9949, F 391.3

|            | <b>df</b> |
|------------|-----------|
| Treatment  | 5         |
| Individual | 2         |
| Residual   | 10        |
| Total      | 17        |
